# Supplementary material for: The long non-coding RNA MYCNOS-01 regulates MYCN protein levels and affects growth of MYCN-amplified rhabdomyosarcoma and neuroblastoma cells
Source: Springer Nature journal article supplement (doi:10.1186/s12885-018-4129-8), 2018-02-21
Supplement: MOESM1 [file 15481170]

# Figure S1

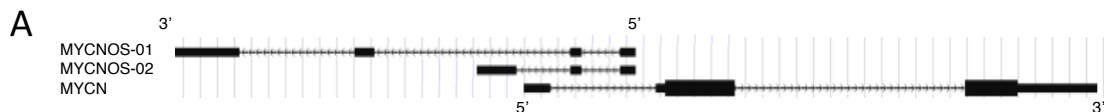

**B**

5'3' Frame 1  
 RGWWRGSATLETAISFTQGTAWGRGLFLAAEF **Stop**LSRARRQPHSQRCGAGCSGEAPGSPTQLP  
**G Met GHPLEKNPSLWGRGTGSPTAQTQTDLLEPREFLFAEAITPPAP Stop**SPPSPPAEFSPSILSFPV  
 QHSPPFV**Met IHAWEYLFSAHFRDRTVEDRSLPH Stop**PVTWVSFAPEGILTAQQCTCI **Stop**GWY  
**A Met KALSNCWHLDIGLLSLQKHEKYISFLYKLP SLCY Stop**VIATQNELRQVPIYYCV **Stop**APGWVW  
 NRGKLYSRKELTVDQGRPTSE **Met D A S I Stop**SPTARIELYTAFG **Stop**LR **Stop**FLREENILVYKSP  
 L Y **Stop**DTHTQRNNTI H **Met L R R A Q I Met T G Stop**ESNSL **Stop**Met **V F P D C E L K I C W V G Q A W W L T P V I L**  
**A L Q E S E E G R W L E P R I L R P A W A T W Stop**NPVSTKNIKISWAWWVRACGPSYLG **Stop**GRKIT **Stop**AQ  
 GDQGCSPSSHCTPAW **Met T E Stop**DLVSKEKKKDLLSLSSGTRAQFLGSSHL PQNVYIFTD **Stop**I  
**I Stop**K

5'3' Frame 2  
 GGGGEAPQLWKLPPFHSKALPGGGGCSWLQNSSSHEHADNRTRSGVGPAAQGGKQALRPSYREW  
 GTLWRRTPAWGGDAPALRQLKHRQIF **Stop**SRGNFFSQKPLPPPPNRHQALLNSRLASCPFLSSTH  
 LHL **Stop** **Stop**S **Met P G S I C L V L T S V T L W K T G S V S L T N L Stop**PGSVLLQRESLRHSSVPVYRDGTP **Stop**RP  
 SAIAAGTLILD FSARN **Met R N T F L F F I N Y P V C A I R L Stop**QHK **Met N Stop**DKYPSITVSEPLGGFGTEV  
 S **Stop**GTAARSSLWTRREGDPLKW **Met P Q S N H Q L L G Stop**SYTQHLVYN **Stop**GDF **Stop**ERRIF **Stop**FTN  
 LLFTKTHTHKETTHTYT **Stop**EGPKS **Stop**LARRATASRFFFQIVN **Stop**RSAGLARHGGSRLL **Stop**SWH  
 FKSLRRADGLSPGF **Stop**DRPGQHGETLSLQKI **Stop**KLARGGCVVVPATWEAEAGRSPEPREIKAA  
 VCHHHTTALQPG **Stop**QSETLSQKKKKIY **Stop**VCLQGQEH SFS **Stop**DLHTSLK **Met C T F L L I K Stop**FKN

5'3' Frame 3  
 GVVARLRNFGNCFIHTRHCLGEGAVPGCRILALTSTQTTALAAVWGRLLRGSRLSDPATGN GAP  
 FGEEPQPGVGHRLSDSSNDRSSRAEGISFRRSHYSPRPLIATKPSC **Stop**ILA **Stop**HPVLSCPALTSI  
 CNDPCLGVFV **Stop**CSLP **Stop**HCGRQAQSPSLTCDLGQFC SRGNPYGTAVYLYIG **Met V R H E G P Q Q L L**  
**A P Stop**YWTSQPPET **Stop**EIHFFSL **Stop**ITQSVLLGYSNTK **Stop**TETSTHLLLCLSPWVGLEQR **Stop**VKV  
 QPQGAHCGPGKETHI **Stop**NGCLNLITNC **Stop**DRVIHSIWFIKVFIFERGEYFSLQISSLLRHTHTKKQH  
 THTHVEKGNHDWLGEQQPLDGF SRL **Stop**IKDLLGWPG **Met V A H A C N P G T S R V Stop**GG  
 Q **Met A Stop**AQDFETGLGN **Met V K P C L Y K K Y K N Stop**LGVVGA CLWSQLLGR LRQEDHLS PGRSRLQC  
 AIITPLHSSLDDRVRPCLKRKKKRSTESVFRDKSTVSPRIFTPPSKCVHFY **Stop**LNNLKI

**C**

| <u>No. of ATG from 5'end</u> | <u>Reliability</u> | <u>Frame</u> | <u>Identity to Kozak rule A/GXXATGG</u> | <u>Start (bp)</u> | <u>Finish (bp)</u> | <u>ORF Length (aa)</u> | <u>Stop codon found?</u> | <u>Sequence</u>                              |
|------------------------------|--------------------|--------------|-----------------------------------------|-------------------|--------------------|------------------------|--------------------------|----------------------------------------------|
| 1                            | 0.10               | 1            | GXXATGG                                 | 49                | 180                | 44                     | Yes                      | MGHPLEKNPSLWGRGTGSPTAQTQTDLLEPREFLFAEAITPPAP |
| 2                            | 0.06               | 1            | GXXATGa                                 | 259               | 333                | 25                     | Yes                      | MIHAWEYLFSAHFRDRTVEDRSLPH                    |
| 3                            | 0.06               | 2            | tXXATGc                                 | 266               | 340                | 25                     | Yes                      | MPGSICLVLTSTVTLWKTGVS LTNL                   |
| 5                            | 0.06               | 1            | GXXATGa                                 | 415               | 519                | 35                     | Yes                      | MKALSNCWHLDIGLLSLQKHEKYISFLYKLP SLCY         |
| 10                           | 0.05               | 1            | cXXATGt                                 | 820               | 849                | 10                     | Yes                      | MLRRAQIMTG                                   |
