# Supplementary material for: The long non-coding RNA MYCNOS-01 regulates MYCN protein levels and affects growth of MYCN-amplified rhabdomyosarcoma and neuroblastoma cells
Source: Springer Nature journal article supplement (doi:10.1186/s12885-018-4129-8), 2018-02-21

Figure S9

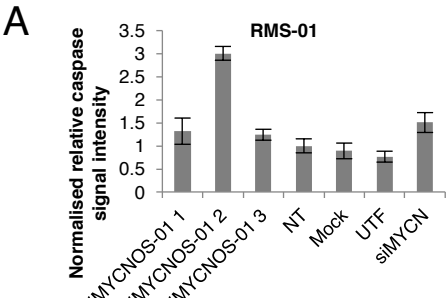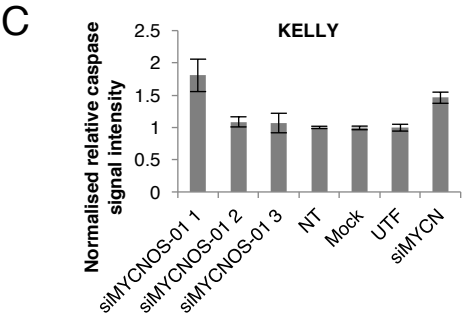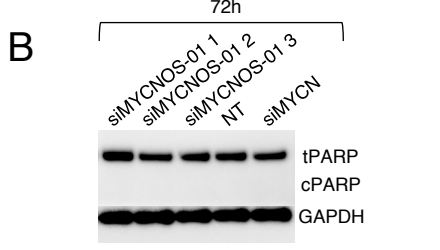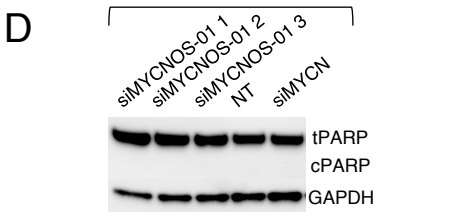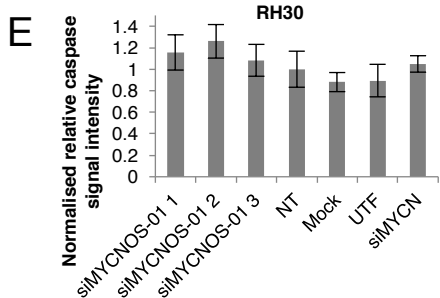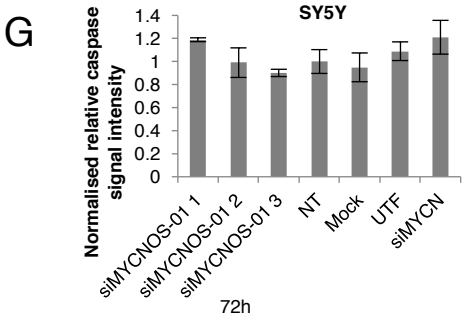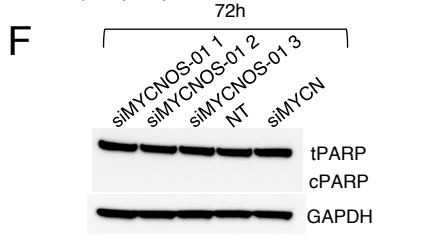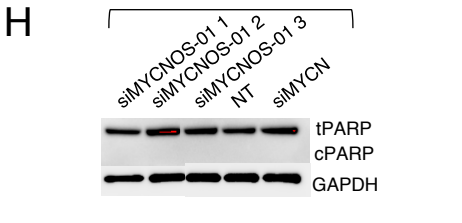

Supplement: MOESM9 [file 15481170]
